# Supplementary material
Source: MDPI journal article supplement (https://www.mdpi.com/2073-4433/13/6/972)
Supplement: s1 [file s1]

## Supplementary Materials:

Article

# Dynamics of Precipitation Anomalies in Tropical South America

Mario Córdova <sup>1,2,3,\*</sup>, Rolando Céleri <sup>1,3</sup> and Aarnout van Delden <sup>2</sup>

<sup>1</sup> Departamento de Recursos Hídricos y Ciencias Ambientales, Universidad de Cuenca, Cuenca 010105, Ecuador; rolando.celleri@ucuenca.edu.ec

<sup>2</sup> Institute for Marine and Atmospheric Research Utrecht (IMAU), Utrecht University, 3508 TA Utrecht, The Netherlands; a.j.vandelden@uu.nl

<sup>3</sup> Facultad de Ingeniería, Universidad de Cuenca, Cuenca 010215, Ecuador

\* Correspondence: mario.cordovam@ucuenca.edu.ec

**Citation:** Córdova, M.; Céleri, R.; van Delden, A. Dynamics of Precipitation Anomalies in Tropical South America. *Atmosphere* **2022**, *13*, 972. <https://doi.org/10.3390/atmos13060972>

Academic Editor: Mario Marcello Miglietta

Received: 27 April 2022

Accepted: 4 June 2022

Published: 15 June 2022

**Publisher's Note:** MDPI stays neutral with regard to jurisdictional claims in published maps and institutional affiliations.

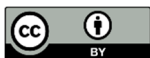

**Copyright:** © 2022 by the authors. Submitted for possible open access publication under the terms and conditions of the Creative Commons Attribution (CC BY) license (<https://creativecommons.org/licenses/by/4.0/>).

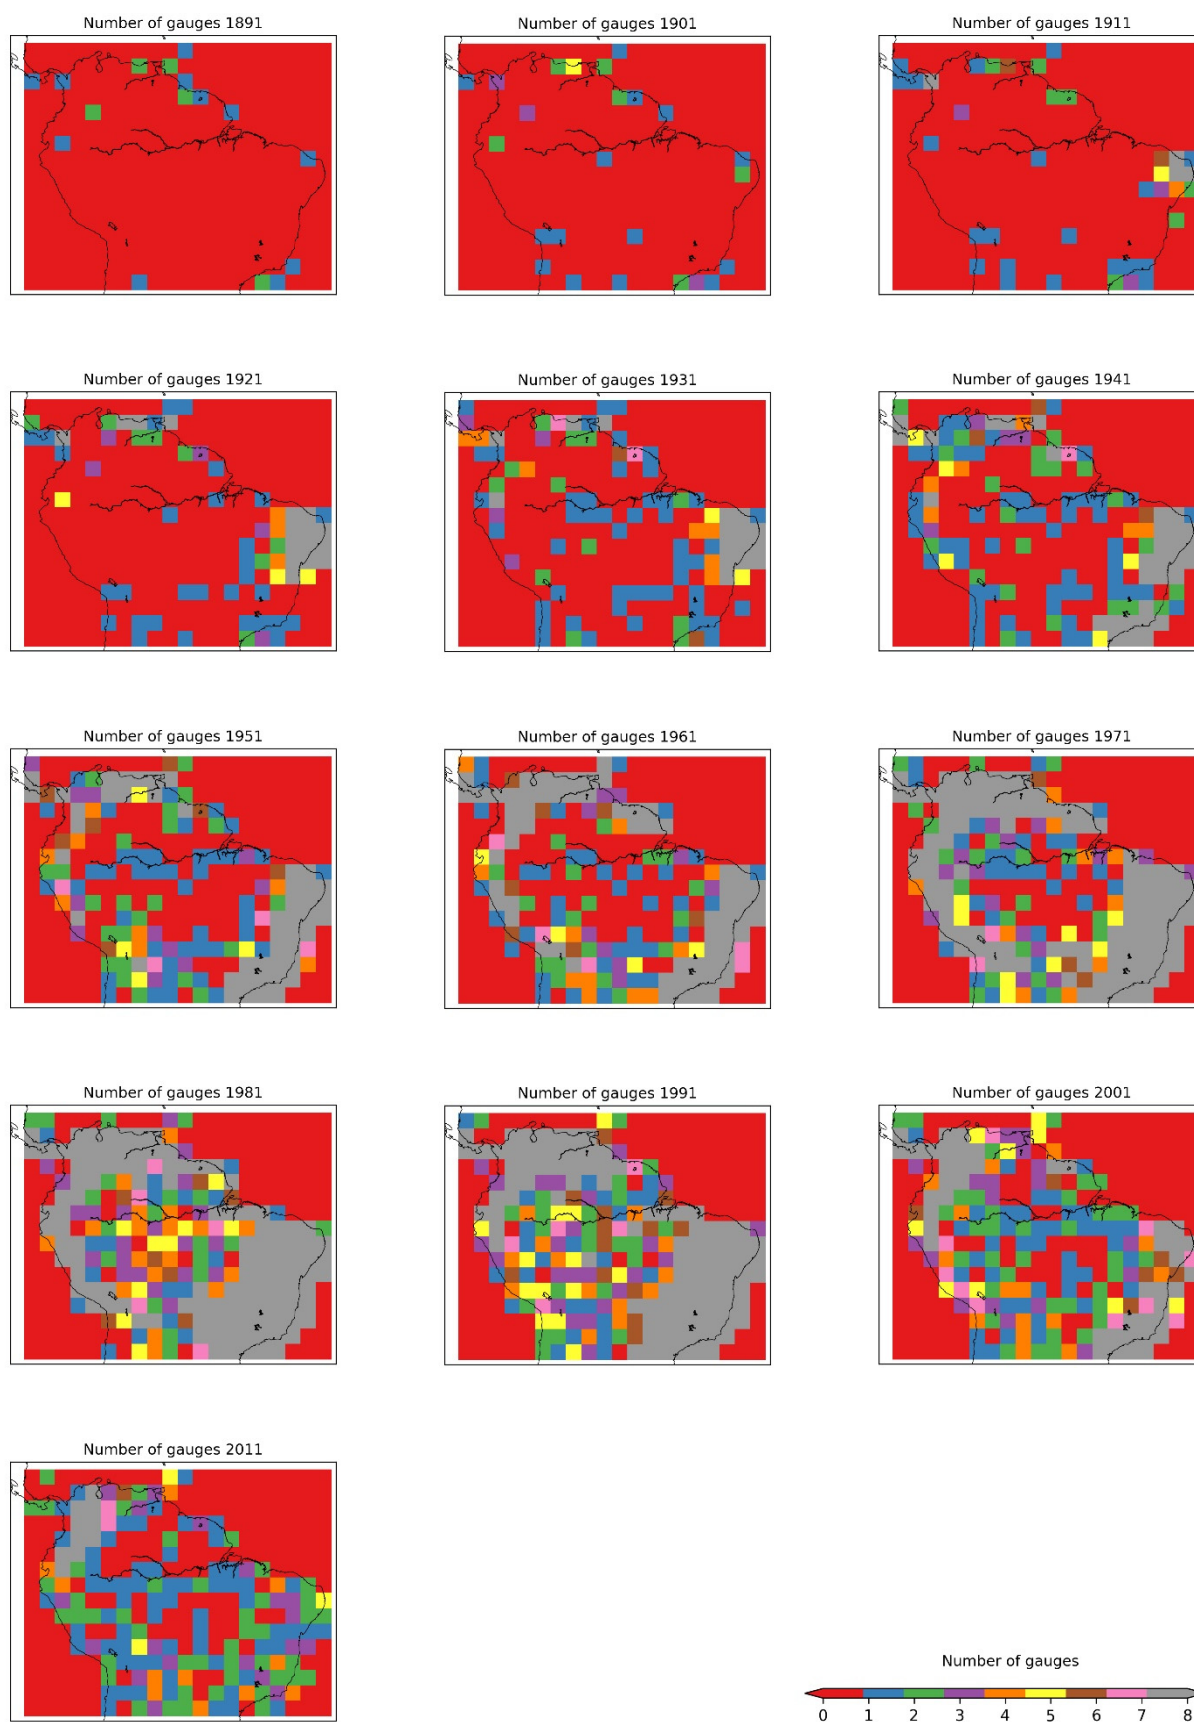

---

Figure S1: Number of rain gauges in each pixel of the GPCC dataset for different years for the study area. The gray colors correspond to pixels with more than eight rain gauges.
